# Supplementary material
Source: Royal Society of Chemistry journal article supplement (doi:10.1039/d6nj00469e)
Supplement: d6nj00469e1.pdf [file d6nj00469e1.pdf]

**Supporting information**

**Dual-biocatalytic L-lactate production from gaseous CO<sub>2</sub> and  
acetaldehyde**

Kazuma Suehiro<sup>a</sup> and Yutaka Amao<sup>a,b\*</sup>

<sup>a</sup> Graduate School of Science, Osaka Metropolitan University, 3-3-138 Sugimoto,  
Sumiyoshi-ku, Osaka 558-8585, Japan

<sup>b</sup> Research Centre of Artificial Photosynthesis (ReCAP), Osaka Metropolitan University,  
3-3-138 Sugimoto, Sumiyoshi-ku, Osaka 558-8585, Japan

Email:amao@omu.ac.jp

### 1. The determination of the amount of L-lactate using ion chromatography

The concentration of L-lactate was determined using ion chromatography system (Metrohm, Eco IC; electrical conductivity detector) with an ion exclusion column (Metrosep Organic Acids 250/7.8 Metrohm; column size: 7.8 × 250 mm; composed of 9 μm polystyrene-divinylbenzene copolymer with sulfonic acid groups). The 1.0 mM perchloric acid and 50 mM lithium chloride in aqueous solution were used as an eluent and a regenerant, respectively. Flow rate of eluent solution was adjusted to be 0.5 mL min<sup>-1</sup>. The retention time for L-lactate was detected at 12.0-13.2 min. The electrical conductivity changes in the various L-lactate concentrations (0 – 100 μM) during the ion chromatograph analysis were shown in **Figure S1(a)**. **Figure S1(b)** shows the relationship between the detection peak area and the L-lactate concentration using ion chromatograph.

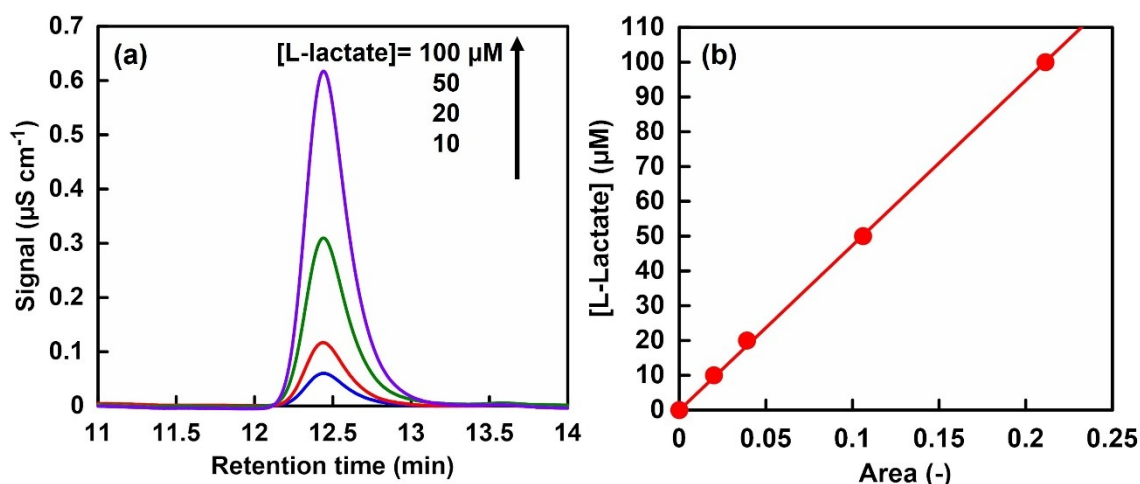

**Figure S1(a)**. A chart of ion chromatogram of L-lactate (0-100 μM) in 200 mM phosphate buffer (pH 7.0). **(b)**: Relationship between the detection peak area and the L-lactate concentration.

As shown in **Figure S1(b)**, the detected peak area and the L-lactate concentration showed a good linear relationship (correlation coefficient:  $r^2=0.99$ ) as following equation [Eq. (S1)].

$$[\text{L-lactate}] (\mu\text{M}) = 4.74 \times 10^2 \times \text{Area} \quad (\text{S1})$$

## 2. The determination of the amount of acetoin using UV-vis absorption spectroscopy

Acetoin (0 – 500  $\mu\text{M}$ ) was added to 0.5% creatine and 5% 1-naphthol-4 M NaOH, and the mixture was incubated at 30.5  $^{\circ}\text{C}$  for 10 min. The reaction solution was then diluted four times with ultrapure water, and the UV-vis absorption spectrum was measured to estimate the concentration from the absorbance at 525 nm based on the derivatized acetoin. **Figure S2(a)** shows the UV-vis absorption spectral change in the various acetoin concentrations. **Figure S2(b)** shows the relationship between the absorbance at 525 nm and the acetoin concentration using UV-vis absorption spectrometer

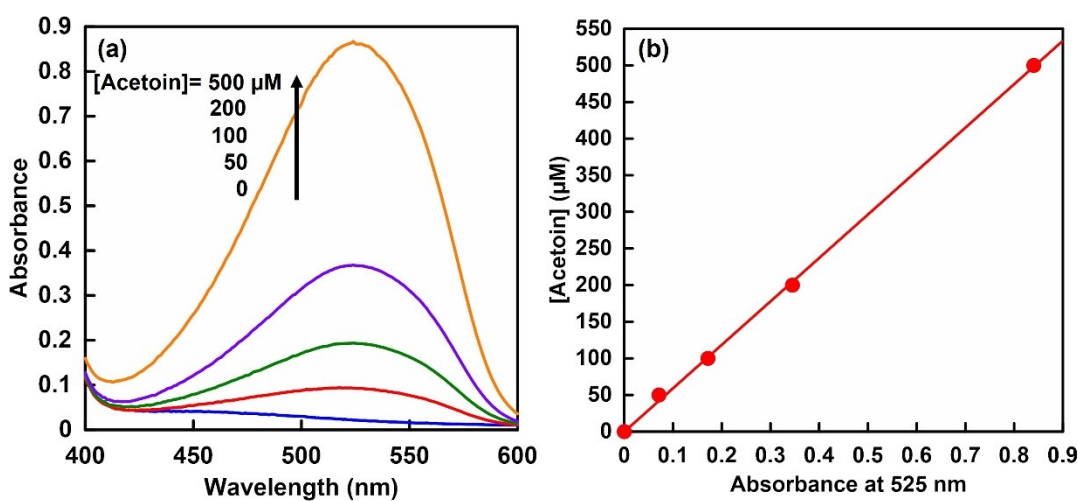

(SHIMADZU, MultiSpec-1500).

**Figure S2(a).** UV-vis absorption spectral change in the various acetoin concentrations (0 – 500  $\mu\text{M}$ ). **(b):** Relationship between the absorbance at 525 nm and the acetoin concentrations.

As shown in **Figure S2(b)**, the detected peak area and the L-lactate concentration showed a good linear relationship (correlation coefficient:  $r^2=0.99$ ) as following equation [Eq. (S2)].

$$[\text{Acetoin}] (\mu\text{M}) = 5.93 \times 10^2 \times \text{Absorbance} \quad (\text{S2})$$
